1                    Effects of dietary taurine level on visual function in European sea bass

2                                            (*Dicentrarchus labrax*)

3  
4 Richard W. Brill\*, Andrij Z. Horodysky<sup>2</sup>, Allen R. Place<sup>3</sup>, Mary E.M. Larkin<sup>3</sup>, Renate  
5 Reimschuessel<sup>4</sup>

6  
7  
8  
9    <sup>1</sup> Department of Fisheries Science, Virginia Institute of Marine Science, Gloucester Point,  
10 Virginia, United State of America

11  
12    <sup>2</sup> Department of Marine and Environmental Science, Hampton University, Hampton, Virginia,  
13 United State of America

14  
15    <sup>3</sup> Institute of Marine and Environmental Technology, University of Maryland Center for  
16 Environmental Science, Baltimore, Maryland, United State of America

17  
18    <sup>4</sup> Center for Veterinary Medicine, U.S. Food and Drug Administration, Rockville, Maryland,  
19 United State of America

20  
21  
22  
23    \* Corresponding author

24    E-mail: [rbrill@vims.edu](mailto:rbrill@vims.edu) (RB)

## 28 **Abstract**

29           Dietary insufficiencies have been well documented to decrease growth rates and survival  
30 (and therefore overall production) in fish aquaculture. By contrast, the effects of dietary  
31 insufficiencies on the sensory biology of cultured fish remains largely unstudied. Diets based  
32 solely on plant protein sources could have advantages over fish-based diets, because of the cost  
33 and ecological effects of the latter, but lack the amino acid taurine. Adequate levels of taurine  
34 are, however, necessary for the development of a fully functional visual system in mammals. As  
35 part of ongoing studies to determine the suitability of plant-based diets, we investigated the  
36 effects of normal and reduced taurine dietary levels on retinal anatomy and function in European  
37 sea bass (*Dicentrarchus labrax*). We could not demonstrate any effects of dietary taurine level  
38 on retinal anatomy, nor the functional properties of luminous sensitivity or temporal resolution  
39 (measured as flicker fusion frequency). We did, however, find an effect on spectral sensitivity.  
40 The peak of spectral sensitivity of individuals fed a 5% taurine diet was rightward shifted (i.e.,  
41 towards longer wavelengths) relative to that of fish fed a 0% or 1.5 % taurine diet. This  
42 difference in in spectral sensitivity was due to a relatively lower level of middle wavelength  
43 pigment (maximum absorbance  $\lambda_{500}$  nm) in fish fed a 5% taurine diet. Changes in spectral  
44 sensitivity resulting from diets containing different taurine levels are unlikely to be detrimental  
45 to fish destined for market but could be in fishes that are being reared for stock enhancement  
46 programs.

47

48

## 49 **Introduction**

50 Carnivorous fishes cannot synthesize many essential amino and fatty acids and must  
51 receive them through their diet [1,2]. Consequently, the aquaculture of these species requires  
52 diets based on, or at least supplemented with, protein sources from wild-caught fish. Up to two to  
53 five times more fish is, however, required to culture a product than is provided by it [3]. This  
54 increases the cost of production and can have ecological consequences as capture of wild-caught  
55 fish may impact forage fish populations and the higher trophic level species that feed on them  
56 [4,5]. An equally important concern is the potential for fishmeal to contain xenobiotic  
57 compounds such as polychlorinated biphenyls (PCB's) and mercury. These undergo  
58 biomagnification leading to elevated levels of contaminants in the endproduct. In brief, fishmeal  
59 diets for the aquaculture of carnivorous fishes are costly, and potentially unsustainable as well as  
60 unsafe. Purely plant-based diets circumvent these issues, but generally lack essential and semi-  
61 essential amino acids (e.g., taurine, methionine, lysine), as well as many vitamins and minerals  
62 needed in microquantities [6]. Plant-based diets are therefore currently supplemented with  
63 fishmeal or fish oil [7,8,9]. But we argue, as have others [10]), that there remains an exigent need  
64 to determine if purely plant-based diets can support survival rates, growth rates, and feeding  
65 efficiencies (i.e., the ratio of the mass of fish produced per mass of feed) necessary for the  
66 successful aquaculture of carnivorous fishes.

67 Omnivorous species have been the easiest to convert to low or no fishmeal diets; whereas  
68 marine carnivorous species have been the most difficult [11]. But it is the latter that are produced  
69 by aquaculture for restocking programs (i.e., to augment wild populations [12]). Diets differing  
70 in fatty acid composition can have significant impacts on the growth performance, energetics,  
71 cardiorespiratory physiology, hypoxia tolerances, and exercise and recovery performance of

72 fishes [13-17]. It is therefore plausible that the metabolic performance and hypoxia tolerances of  
73 fishes fed plant-based diets may be significantly different – with major implications for the  
74 suitability of fishes for re-stocking programs.

75 More specific to our project, plant protein sources lack taurine. Taurine is a sulfur  
76 containing amino acid that is found in higher concentrations than any other free amino acid (i.e.,  
77 amino acids not incorporated into any known proteins) and its roles in the proper development  
78 and function in a variety of vertebrate tissues have received considerable attention [18-21].  
79 Taurine is considered a conditionally indispensable amino acid for humans and non-human  
80 primates and an essential amino acid in some mammalian carnivores (e.g., felines) [20], but little  
81 attention has been paid to the required levels of this amino acid or its roles in fishes. We  
82 hypothesize that most marine carnivorous fishes lack the little ability to synthesize taurine (due  
83 to the large quantities found in their natural prey items) and therefore require it to be supplied in  
84 the diet. We also hypothesize that plant-based diets may not allow for development of fully  
85 functional visual system as a low taurine diet, or treatments with agonists of taurine uptake, have  
86 been documented to impede the embryonic development of the retina and maintenance of normal  
87 retinal function in mammals; the latter because of taurine's role as an antioxidant and osmolyte  
88 (i.e., a compound maintaining intracellular osmotic balance) [20-24]. High concentrations of  
89 taurine have, moreover, been found in the photoreceptor cells (i.e., rod and cone cells) and retinal  
90 pigment epithelium in several teleost fish species [25-30]. Although it has been suggested that  
91 taurine is only an osmolyte in retinal cells of fishes [26], other investigators have concluded that  
92 the role of taurine in development and maintenance of retinal function is conserved throughout  
93 the vertebrate order [21,31]. We therefore posit that diets containing inadequate levels of taurine  
94 could result in diminished visual system function in carnivorous fishes. We recognize that less

95 than fully functional visual systems are unlikely to be detrimental to fish destined for market, yet  
96 we contend that a diminished functionality of the visual system of fishes being cultured for stock  
97 enhancement programs would decrease their survival and fitness (e.g., growth and reproduction)  
98 relative to wild individuals. If this is the case, programs rearing fish for restocking would be less  
99 able to meet their ultimate objective. Therefore, in conjunction with our ongoing study  
100 examining the overall efficacy of formulations of our plant-based diet for generating acceptable  
101 growth rates in European sea bass, we expanded our efforts to examine the effects of dietary  
102 taurine level on visual function.

103

## 104 **Materials and Methods**

105 Our study was carried out under protocols approved by the Institutional Animal Care and  
106 Use Committees of the University of Maryland Baltimore Medical School and the College of  
107 William and Mary and followed all applicable laws and regulations. European sea bass were  
108 obtained from the Aquaculture Research Center at the Institute of Marine and Environmental  
109 Technology (IMET, Baltimore, MD). The average starting weight was ~15 g for fish  
110 subsequently reared on the 5% taurine diet and ~25 g for fish subsequently reared on the 0 or  
111 1.5% taurine diet. Fish were divided by diet and housed in eight-foot diameter, four cubic meter  
112 recirculating systems with shared mechanical and life support systems. The latter included a  
113 protein skimmer, ozonation, mechanical filtration (in the form of bubble-bead filters), and  
114 biological filtration. Water quality (measured two to three times per week) was not significantly  
115 different between systems (ANOVA,  $p > 0.05$ ). Mean ( $\pm$  SEM) water quality values in the tanks  
116 were: dissolved oxygen  $5.7 \pm 1.6$  mg L<sup>-1</sup>, temperature  $27 \pm 2$  °C, pH  $7.6 \pm 0.3$ , total ammonia

117 nitrogen ( $\text{NH}_3$ )  $0.06 \pm 0.06$  mg L<sup>-1</sup>, nitrite ( $\text{NO}_2^-$ )  $0.12 \pm 0.08$  mg L<sup>-1</sup>, nitrate ( $\text{NO}_3^-$ )  $49 \pm 9$  mg  
118 L<sup>-1</sup>, alkalinity  $96 \pm 23$  meq L<sup>-1</sup>, and salinity  $25 \pm 2$  ppt. Fish were fed 3.5% of their body  
119 weight per day and maintained on each specific diets for five to six months.

120

## 121 **Diet preparation**

122 The three diets formulations (Table 1) were prepared by Zeigler Bros. (Gardners, PA,  
123 USA) and analysis of their proximate composition (Table 2) was performed by New Jersey Feed  
124 Laboratory, Inc. (Ewing Township, NJ, USA).

125

126 **Table 1. Formulations for the three experimental diets.**

127

| Constituent                    | 0% taurine | 1.5% taurine | 5% taurine |
|--------------------------------|------------|--------------|------------|
| Profine VF                     | 28.75      | 28.75        | 28.75      |
| Soybean meal, 47.5%            | 23.33      | 23.33        | 23.33      |
| Wheat flour, bagged            | 16.54      | 15.04        | 11.54      |
| Corn gluten, 60%               | 15.34      | 15.34        | 15.34      |
| Menhaden gold oil, top-dressed | 5.96       | 5.96         | 5.96       |
| Monocalcium phosphate FG       | 3.95       | 3.95         | 3.95       |
| Lecithin FG                    | 3          | 3            | 3          |
| L-Lysine, 98.5%                | 0.75       | 0.75         | 0.75       |
| Choline chloride, 70%          | 0.6        | 0.6          | 0.6        |
| Potassium chloride FG          | 0.56       | 0.56         | 0.56       |
| DL-Methionine, 99%             | 0.45       | 0.45         | 0.45       |
| Sodium chloride                | 0.28       | 0.28         | 0.28       |
| Vitamin C                      | 0.2        | 0.2          | 0.2        |
| Premix AquaVit                 | 0.12       | 0.12         | 0.12       |
| Premix Aquamin Fish            | 0.12       | 0.12         | 0.12       |
| Magnesium oxide FG             | 0.05       | 0.05         | 0.05       |

|            |   |     |   |
|------------|---|-----|---|
| Taurine FG | 0 | 1.5 | 5 |
|------------|---|-----|---|

128 FG = food grade

129

130 **Table 2. Proximate composition (%) of three experimental diets.**

131

132

| Constituent | 0% taurine | 1.5% taurine | 5% taurine |
|-------------|------------|--------------|------------|
| Moisture    | 8.05       | 6.97         | 9.5        |
| Protein     | 43.82      | 45.02        | 46.65      |
| Fat         | 5.94       | 6.19         | 6.94       |
| Fiber       | 3.06       | 1.95         | 2.25       |
| Ash         | 7.08       | 7.75         | 7.71       |
| Taurine     | 0.07       | 1.48         | 4.85       |

133

134

135

## 136 **Tissue sampling for analysis retinal anatomy**

137

138

139

140

141

142

143

144

145

## 146 **Retinal responses to light stimuli**

147

148

149

150

Eyes were harvested from fish not used in the ERG experiments. Food was withheld for 24 hours and 10-12 fish from each diet were anesthetized in a bath containing 25 mg L<sup>-1</sup> MS-222 (Syndel, Ferndale, WA, USA) buffered with 50 mg L<sup>-1</sup> sodium bicarbonate (Sigma-Aldrich, St. Louis, MO, USA). Upon removal from the anesthesia bath, the spinal cord was immediately severed, and eyes harvested. Retinal tissue was subsequently embedded, sectioned, mounted on glass slides, and stained with Hematoxylin-Eosin using standard histological procedures. Images were captured using a BX53 microscope outfitted with a DP73 camera and visualized with the cellsSens software (version 510) (Olympus, Center Valley, PA, USA).

Fish were transferred to the Virginia Institute of Marine Science (Gloucester Point, VA) where whole-animal corneal electroretinography (ERG) was used to assess three standard metrics of retinal function: (1) luminous sensitivity (V log I response), (2) flicker fusion frequency (FFF, a measure of temporal resolution), and (3) spectral sensitivity (32-36).

151 Anesthesia and handling methodologies were as described previously (33-35). Teflon-coated,  
152 silver – silver chloride, 0.5mm wire electrodes were used to measure ERG potentials: the active  
153 electrode was placed on the corneal surface and a reference electrode in the nasal cavity. All  
154 subjects were dark-adapted for a minimum of 60 minutes prior to visual trials. Electrode  
155 placements, as well as any further modifications to the experimental setup, were conducted under  
156 a dim red LED light source (peak wavelength of 660 nm) that is beyond the spectral sensitivity  
157 of European sea bass.

158 Luminous sensitivity was assessed using stimulus intensities covering six orders of  
159 magnitude using a collimated white LED source and neutral density filters progressing from  
160 subthreshold to saturation intensity levels in 0.2 log unit steps. FFF was assessed by measuring  
161 the ability of the retinal responses to track sinusoidally modulated white light stimuli ranging in  
162 frequency from 1 Hz (0 log units) to 100 Hz (2.0 log units), presented in increments of 0.2 log  
163 unit frequency steps. FFF was measured at stimulus intensities of 25%, 50% and 100% of the  
164 maximum response, as well as fixed light levels (log I = 1.9, 2.7, and 3.7; with I in units of  
165 candela per m<sup>2</sup>). Spectral sensitivity was assessed using stimuli over wavelengths from the  
166 ultraviolet (300 nm) to the near infrared (700 nm) presented sequentially in 10 nm steps.  
167 Monochromatic light flashes (50% bandwidth = 5 nm) were made approximately equally quantal  
168 through a series of neutral density filters and subsequently corrected to predict isoquantal  
169 responses, as described previously (33-36). To form hypotheses regarding the number and  
170 spectral distribution of visual pigments present, and the effects of dietary taurine levels on the  
171 distribution of pigments contributing to spectral sensitivity, we fitted the SSH [37] and GFRKD  
172 [38] vitamin A1 rhodopsin absorbance templates separately to the photopic spectral sensitivity  
173 data. Estimates of the unknown model parameters ( $\lambda_{\max}$  values and their respective weighting



174 proportions) were derived by fitting the summed curves to the ERG data using maximum  
175 likelihood. We objectively selected the appropriate template (SSH or GFRKD) and number of  
176 contributing pigments using an information theoretic approach following Akaike's information  
177 criterion that is a parsimonious measure that strikes a balance between model simplicity and  
178 complex overparameterization (39). All parameter optimization, template fitting and model  
179 selection was conducted using the software package R version 3.2.2 (R Development Core  
180 Team).

181         Statistical tests comparing the effects of dietary taurine levels on the magnitude of  
182 responses to various light levels were done using Sigmaplot (version 11.2, Systat Software, San  
183 Jose, CA). Analysis of data were performed using a one-way analysis of variance (ANOVA) test  
184 on means when the data were normally distributed, and a Kruskal-Wallis one-way analysis of  
185 variance on ranks when the data were not. Comparisons the magnitude of responses to various  
186 light levels (i.e., luminous sensitivity) tests were limited to the effects of diet within a given light  
187 levels. Statistical tests comparing the effects of dietary taurine levels on FFF were preformed  
188 using the two-way repeated measures ANOVA procedure in Sigmaplot, with the Holm-Sidak  
189 method to conduct all pairwise multiple comparisons.

190

## 191 **Results and discussion**

### 192 **Retinal morphology**

193         There were no obvious effects of dietary taurine level on the morphology of identifiable  
194 layers in European sea bass retina (Fig 1) not retinal cell layer thickness ratios (Fig 2) equivalent  
195 to the massive disruption seen in retinal tissue of domestic cats fed low taurine diets [40].

196

197 **Fig 1. Identifiable layers in European sea bass retinas.** Panel A is a representative retina from  
198 fish fed a 0% taurine diet, panel B is a representative retina from fish fed a 5% taurine diet.  
199 G=ganglion cell layer, IP=inner plexiform layer, IN=inner nuclear layer, OP=outer plexiform  
200 layer; ON=outer nuclear layer, C=cone photoreceptors, OS=outer segments of the photoreceptor  
201 layer, PE=pigmented epithelium.

202

203 **Fig 2. Retinal cell layer thickness ratios in European sea bass fed diets with 0 or 5% taurine**  
204 **(open and cross hatched boxes, respectively).** The boundary of the box closest to zero indicates  
205 the 25<sup>th</sup> percentile, the line within the box marks the median, and the boundary of the box  
206 farthest from zero indicates the 75<sup>th</sup> percentile. Whiskers (error bars) below and above the box  
207 indicate the 10<sup>th</sup> and 90<sup>th</sup> percentiles, respectively. Data points above and below the whiskers are  
208 considered outliers. T= total retina thickness, C= cone photoreceptors layer thickness, ON=outer  
209 nuclear layer thickness, OS= thickness of the outer segments of photoreceptor layer, IN=inner  
210 nuclear layer thickness ( $\mu\text{m}$ ).

211

## 212 **Retinal function**

213

214 Retinal responses to increasing light levels showed the expected steep increases up to  
215 those levels producing maximum response (Fig 3). When light levels are expressed in log units,  
216 retinal response curves were the expected sigmoidal shape (Fig 3 insert). There was only one  
217 significant effect of dietary taurine levels on luminous sensitivity in European sea bass, and only  
218 at light levels needed to produce a response 75% of maximum (Fig 4). In other words,  
219 significantly higher light levels were required to achieve responses above approximately 50% of  
220 maximum in fish fed a diet lacking taurine. Flicker fusion frequencies generally showed the  
221 expected increases with increasing light intensities, and dietary taurine level had no influence on

222 FFF when comparisons are made at the same light level (Fig 5).

223

224

225 **Fig 3. Luminous sensitivity (i.e., intensity–response curves) of European sea bass.** Data are  
226 mean values ( $\pm$  SEM). Response values for individuals were normalized to 0-100%, the values  
227 averaged, and the mean values rescaled to 0-100%. The inset shows the same data, but with light  
228 intensities expressed in log units. Increases in light intensity were in 0.2 log unit steps.

229

230 **Fig 4. Light levels needed to produce a given response relative to that of the maximum**  
231 **response in intensity–response curves (Fig 3).** The boundary of the box closest to zero  
232 indicates the 25<sup>th</sup> percentile, the line within the box marks the median, and the boundary of the  
233 box farthest from zero indicates the 75<sup>th</sup> percentile. Whiskers (error bars) above and below the  
234 box indicate the 90<sup>th</sup> and 10<sup>th</sup> percentiles. Data points above and below the 90<sup>th</sup> and 10<sup>th</sup>  
235 percentiles are considered outliers and are not used to determine median values.

236

237 **Fig 5. Flicker fusion frequencies (i.e., the highest frequency of sinusoidal light stimulus**  
238 **detectable) with increasing light intensities of European seabass.** The light levels used  
239 correspond to approximately those needed to produce responses approximately 25%, 50% and  
240 75% of the maximum response in the intensity–response curves (Fig 3). The symbols #, \*, and ^  
241 indicate differences in flicker fusion frequencies between log light levels 1.9 and 2.7, between  
242 log light levels 1.9 and 3.7, and between log light levels 2.7 and 3.7, respectively. The boundary  
243 of the box closest to zero indicates the 25<sup>th</sup> percentile, the line within the box marks the median,  
244 and the boundary of the box farthest from zero indicates the 75<sup>th</sup> percentile. Whiskers (error bars)

245 above and below the box indicate the 90<sup>th</sup> and 10<sup>th</sup> percentiles. Data points above and below the  
 246 90<sup>th</sup> and 10<sup>th</sup> percentiles are considered outliers and are not used to determine median values.

247

248

249 The spectral sensitivity of fish fed diets with reduced taurine levels (i.e., 0 and 1.5%)  
 250 were not significantly different from each other (Fig 6, panels A and B) and these data were  
 251 subsequently combined. The results from fitting the data to both SSH and GFRKD rhodopsin  
 252 templates suggested that European seabass are trichromats (i.e., have three visual pigments)  
 253 (Tables 3 and 4). The SSH rhodopsin template was clearly best fitting (i.e., had the lowest AIC  
 254 value) for the combined data from fish fed diets with reduced taurine levels (Table 3). In the case  
 255 of data from fish fed 5% taurine diet (Table 4), the AIC values (i.e., goodness of fits) for SSH  
 256 rhodopsin templates for dichromats (i.e., two retinal pigments) with secondary absorbing peaks  
 257 (i.e.,  $\overline{AB}$  bands) on both the visual pigments, and the SSH and GFRKD rhodopsin templates for  
 258 trichromats, were indistinguishable ( $\Rightarrow$  AIC < 5). The SSH template for a dichromat with  
 259 secondary absorbing peaks on both pigments predicted, however, the short wavelength pigment  
 260 to have maximum absorbance in the UV wavelength (376 nm) which we consider unreasonable  
 261 given the results from ERG data fitted similarly from a variety of inshore fishes (34-35, 41). We  
 262 therefore based our subsequent conclusions on the effects diet on SSH rhodopsin templates for  
 263 trichromats.

264

265

266 **Table 3. The spectral sensitivity of European seabass fed diets with reduced taurine levels**  
 267 **(i.e., 0 and 1.5%) where the data from fish in these two groups have been combined.**

268

| Condition | Template | $\lambda_{\max,1}$ | $\lambda_{\max,2}$ | $\lambda_{\max,3}$ | $-\log(L)$ | p | AIC | $\Rightarrow$ AIC | Pigment weights |
|-----------|----------|--------------------|--------------------|--------------------|------------|---|-----|-------------------|-----------------|
| Mono      | GFRKD    | 574                |                    |                    | -32.1      | 8 | -58 | 169               |                 |

|                 |       |     |     |     |       |   |      |     |               |
|-----------------|-------|-----|-----|-----|-------|---|------|-----|---------------|
|                 | SSH   | 575 |     |     | -26.5 | 8 | -47  | 180 |               |
| Di, $\alpha$    | GFRKD | 410 | 510 |     | -91.3 | 8 | -172 | 55  |               |
|                 | SSH   | 411 | 510 |     | -91.0 | 8 | -173 | 55  |               |
| Di, $\beta$ , S | GFRKD | 498 | 603 |     | -79.7 | 8 | -147 | 80  |               |
|                 | SSH   | 504 | 604 |     | -97.7 | 8 | -183 | 44  |               |
| Di, $\beta$ , L | GFRKD | 439 | 513 |     | -79.5 | 8 | -147 | 80  |               |
|                 | SSH   | 461 | 513 |     | -96.5 | 8 | -181 | 46  |               |
| Di, $\beta$ , B | GFRKD | 509 | 601 |     | -67.2 | 8 | -120 | 107 |               |
|                 | SSH   | 527 | 605 |     | -82.0 | 8 | -150 | 77  |               |
| Tri, $\alpha$   | GFRKD | 388 | 501 | 603 | -97.4 | 8 | -181 | 47  |               |
|                 | SSH   | 389 | 512 | 611 | 120.7 | 8 | -227 | 0   | 0.24, 0.91, 1 |

269

270 **Table 4. The spectral sensitivity of European seabass fed a 5% taurine diet.**

271

| Condition       | Template | $\text{---}_{\max,1}$ | $\text{---}_{\max,2}$ | $\text{---}_{\max,3}$ | $-\log(L)$ | p | AIC  | $\Delta$ AIC | Pigment weights |
|-----------------|----------|-----------------------|-----------------------|-----------------------|------------|---|------|--------------|-----------------|
| Mono            | GFRKD    | 586                   |                       |                       | -52.2      | 8 | -98  | 92           |                 |
|                 | SSH      | 588                   |                       |                       | -44.6      | 8 | -83  | 108          |                 |
| Di, $\alpha$    | GFRKD    | 485                   | 597                   |                       | -83.7      | 8 | -155 | 35           |                 |
|                 | SSH      | 496                   | 598                   |                       | -96.9      | 8 | -182 | 9            |                 |
| Di, $\beta$ , S | GFRKD    | 485                   | 597                   |                       | -83.7      | 8 | -155 | 35           |                 |
|                 | SSH      | 496                   | 598                   |                       | -96.9      | 8 | -182 | 9            |                 |
| Di, $\beta$ , L | GFRKD    | 439                   | 513                   |                       | -79.5      | 8 | -147 | 44           |                 |
|                 | SSH      | 461                   | 513                   |                       | -96.5      | 8 | -181 | 10           |                 |
| Di, $\beta$ , B | GFRKD    | 506                   | 597                   |                       | -76.6      | 8 | -139 | 52           |                 |
|                 | SSH      | 376                   | 599                   |                       | -102.4     | 8 | -191 | 0            |                 |
| Tri, $\alpha$   | GFRKD    | 382                   | 492                   | 597                   | -101.4     | 8 | -189 | 2            |                 |
|                 | SSH      | 380                   | 497                   | 598                   | -101.3     | 8 | -189 | 2            | 0.17, 0.32, 1   |

272

273

274 **Fig 6. Spectral sensitivity (i.e., responses to monochromatic light) of European sea bass.**

275 Data are mean values ( $\pm$  SEM). Response values for individuals were normalized to 0-100%, the

276 values averaged, and the mean values rescaled to 0-100%. Panel A are the differences between

277 mean values of responses of fish fed the three different diets. Panel B are the mean responses of

278 fish feed diets containing 0%, 1.5% and 5% taurine. In both panels, fish feed diets containing

279 0%, 1.5% and 5% taurine are indicated by filled circles, open circles and filled triangles,

280 respectively. Because the spectral sensitivities of fish fed diets containing 0% or 1.5% taurine

281 were largely not different, the data from these individuals were combined and the mean relative

282 responses shown in panels B and C. Wavelengths at maximal absorptions ( $\lambda_{\max}$  values) and  
283 pigment-specific weight values (to the right of each  $\lambda_{\max}$  value) are shown. Black lines are the  
284 summed curves of the visual pigment curves multiplied by their respective weighting factors.  
285 Color coded lines indicate the absorptive characteristics of individual visual pigments. The color  
286 bar at the top of the figure shows the approximate human visual spectrum.

287

288

289 Our results suggested that the visual pigments of European seabass fed diets containing 0  
290 or 1.4% taurine have maximal absorbance peaks ( $\lambda_{\max}$ ) of 389, 512, 611 nm ( $P_1$ ,  $P_2$ ,  $P_3$ ,  
291 respectively; Fig 6, panel C). The maximal absorbance peaks of the visual pigments in fish fed a  
292 diet containing 5% taurine had maximal absorbance peaks ( $\lambda_{\max}$ ) of 380, 497, 598 nm ( $P_1$ ,  $P_2$ ,  $P_3$ ,  
293 respectively; Fig 6, panel D). The most significant differences were a significant effect of dietary  
294 taurine level on the relative abundance of the three visual pigments (Fig 6, panel C). More  
295 specifically, in fish fed 0 and 1.5% taurine diets, the ratio of the middle and long wavelength  
296 visual pigments ( $P_2$  and  $P_3$ , respectively) were approximately equal (0.91 to 1,) with a reduced  
297 abundance of the short wavelength pigment ( $P_1$ ) relative to the most abundant longwave length  
298 pigment ( $P_3$ ) (0.24 to 1) (Fig 6, panel C). By contrast, in fish fed a 5% taurine diet, there was a  
299 reduction in the abundance of the middle wavelength pigment ( $P_2$ ) relative to the long  
300 wavelength pigment ( $P_3$ ) (0.32 to 1) (Fig 6, panel D), while the ratio of the abundance of the  
301 short wavelength pigment ( $P_1$ ) relative to the most abundant longwave length pigment ( $P_3$ ) was  
302 relatively unchanged (0.17 to 1) (Fig 6, panel D). The overall effects of the changes in  
303 abundance of visual pigments was that the peak in overall retinal spectral sensitivity was shifted  
304 to longer wavelengths, from  $\lambda_{530}$  nm in fish fed the 0% or 1.5% taurine diets (Fig 6, panel C), to

305 h600 nm in fish fed the 5% taurine diet (Fig 6, panel D).

306 Replacing fishmeal with plant-based diets is a priority for the aquaculture industry, and  
307 the development of optimized diets is underway [10,42]. Plant-based diets have a high protein  
308 content [43], but commercial feed formulations often vary based on the availability and cost of  
309 ingredients, with different batches containing significantly different proportions or levels of  
310 quality of ingredients, or different ingredients all together. For this reason, the assessment of  
311 multiple ingredients and ingredient combinations is necessary. To address this issue, we  
312 formulated a diet based on available and cost-effective plant ingredients which are effective  
313 fishmeal replacements in rainbow trout (*Oncorhynchus mykiss*) [44-45] and are highly digestible  
314 by European sea bass [46]. But, as with other plant-based diets, our formulation lacks taurine.  
315 There is evidence that, although that taurine can be recycled through the taurine transporter and  
316 biliary recycling pathways, constant dietary supply is required to maintain proper function  
317 throughout multiple tissue types [20]. We assumed that taurine's role as a photoreceptor  
318 protectant would most likely be as an antioxidant, similar to the role it plays in the liver of  
319 Atlantic salmon challenged with pro-oxidants like cadmium chloride [21,47]. We therefore  
320 hypothesized that visual disparities between European seabass fed diets containing 0%, 1.5% and  
321 5% taurine would be due to differences in photoreceptor and pigment repair.

322 We did not, however, see a reduction of luminous sensitivity resulting from reduced  
323 dietary taurine (Fig 2). In contrast, other investigators have demonstrated a large progressive  
324 decrease in ERG amplitudes to a range of light intensities (12-197 cd m<sup>-2</sup>, log light level 1.1 to  
325 2.3) in rats fed a soybean-based diet (containing a negligible amount of taurine) and treated with  
326 guanidinoethyl sulfonate (a compound that depletes of taurine) over 15 weeks [23]. Similar  
327 decreases in ERG amplitudes have been recorded in cats fed a taurine deficient (casein-based)

328 diet (40). These results (in comparison to ours) imply a loss of luminous sensitivity resulting  
329 from a low taurine diet is related to a reduction in the cellular defense mechanisms countering  
330 light- and oxygen induced damage in retinal receptor cells [24], and that taurine deficiency has  
331 different effects in mammals and teleost fishes.

332         Effective visual function at low light levels requires both spatial and temporal summation  
333 within the retina [50-51]. The former results from the convergence of photoreceptors onto  
334 bipolar cells, as seen in fishes occupying dimly lit environments [52-54]. Spatial summation  
335 therefore reduces visual acuity (i.e., the ability to detect the details of an object). Demonstrating  
336 anatomical changes in spatial summation (i.e., changes in the convergence of photoreceptors  
337 onto bipolar cells) was, however beyond the scope of this study. Temporal summation refers to  
338 photoreceptors responding slowly to flashing light as evinced by temporal resolutions (i.e.,  
339 reduced FFF). Low FFF implies a blurring of fast-moving objects or the inability to detect them  
340 at all [50-51, 55-57]. We did specifically investigate the effects of dietary taurine level on flicker  
341 fusion frequency (Fig 5) but could we could not demonstrate any effects of dietary taurine level.  
342 We therefore conclude that there was no effect of dietary taurine level on retinal anatomy in  
343 terms of the degree of the convergence of receptor cells onto bipolar cells.

344         In terms of spectral sensitivity, our results imply that the European seabass visual system  
345 has three visual pigments and, more importantly, that spectral sensitivity can be impacted by diet  
346 taurine content (Fig 6). To the best of our knowledge, we are the first to demonstrate this  
347 phenomenon. Our results could be due to: (1) changes in the relative abundance of the three  
348 visual pigments equivalent to the seasonal shifts seen in other teleost fishes [58-60], or (2)  
349 changes in the amino acid composition of opsin proteins (which influence peak wavelength  
350 absorbancies of visual pigments) that result from changes in amino acid composition of opsin



351 proteins. Changes in amino acid composition of opsin proteins (due to changes in gene  
352 expression) have been shown to occur over ontogeny, through adaptation of individuals to  
353 different light spectra, or changes diurnal lighting patterns [61-67]. Our data do not allow us to  
354 differentiate between changes in the relative abundance of visual pigments or changes in amino  
355 acid composition of opsin proteins. Our results do, however, demonstrate that there is a threshold  
356 effect of dietary taurine in European seabass, in that there were no discernable alterations in  
357 spectral sensitivity of fish fed 0% and 1.5% taurine diets, but a clear difference spectral  
358 sensitivity of fish fed a 5% taurine diet. The net effect of reduced taurine diets was a broader  
359 overall spectral sensitivity, with the peak in spectral sensitivity being leftward-shifted (a greater  
360 sensitivity to shorter wave lengths).

361 We note, however, that one of reasons for undertaking this study was to determine if  
362 fishes being cultured for stock enhancement programs fed a plant-based diet lacking sufficient  
363 taurine could decrease survival and fitness following release. If so, programs rearing fish for  
364 restocking would be less able to meet their ultimate objective of enhancing population  
365 abundance. Our demonstration that reduced dietary taurine levels influence spectral sensitivity  
366 (Fig 6) implies that this is the case. This conclusion is congruent with both the visual pigment  
367 sensitivity hypothesis and the contrast sensitivity hypothesis. The former posits that for optimal  
368 visual function the absorbance of visual pigments must correspond to the spectral distribution of  
369 the light environment [68-70], whereas the latter contends that aquatic animals maximize  
370 contrast sensitivity to acquire information effectively in a turbid (i.e., low contrast) environment  
371 [71-73]. Under both situations, however, changes in the relative abundance of visual pigment is  
372 likely to reduce fitness in cultured fish released for restocking. It unknown, however, if these  
373 deficits would remain following release of cultured, fish or if the visual properties of fish fed 0%

374 and 1.5% taurine diets we observed would converge onto those of fish fed a 5% taurine diet after  
375 the switch to a natural prey diet. These questions are worth investigating.

376  
377

## 378 **Conclusions**

379  
380

381 We could not demonstrate any effects of dietary taurine level on retinal anatomy, the  
382 functional properties of luminous sensitivity nor temporal resolution (i.e., FFF) in European sea  
383 bass. We did, however, find an effect on spectral sensitivity. The peak of spectral sensitivity of  
384 individuals fed a 5% taurine diet was rightward shifted (i.e., towards longer wavelengths)  
385 relative to that of fish fed a 0% or 1.5 % taurine diet. This difference in spectral sensitivity was  
386 caused by a relatively lower level of middle wavelength pigment (maximum absorbance  $\lambda_{500}$   
387 nm) in fish fed a 5% taurine diet. Changes in spectral sensitivity resulting from diets containing  
388 different taurine levels are unlikely to be detrimental to fish destined for market, but could be in  
389 fishes that are being reared for stock enhancement programs.

389  
390

## 391 **Acknowledgements**

392 The authors would like to thank the staff of the Aquaculture Research Center at the Institute of  
393 Marine and Environmental Technology, including Steve Rodgers and Chris Tollini. This is  
394 contribution XXXX from the Virginia Institute of Marine Science. This publication was made  
395 possible by the National Oceanic and Atmospheric Administration, Office of Education  
396 Educational Partnership Program award number (NA11SEC4810002). Its contents are solely the  
397 responsibility of the award recipient and do not necessarily represent the official views of the  
398 U.S. Department of Commerce, National Oceanic and Atmospheric Administration.

399

400

## 401 **References**

402

- 403 1. Silva SS, Anderson TA. Fish nutrition in aquaculture. London: Chapman & Hall; 1995.
- 404 2. Lunger AN, Craig SR, McLean E. Replacement of fish meal in cobia (*Rachycentron*  
405 *canadum*) diets using an organically certified protein. *Aquaculture* 2006;257:393-399
- 406 3. Tacon A, Metian M. Global overview on the use of fish meal and fish oil in industrially  
407 compounded aquafeeds: Trends and future prospects. *Aquaculture* 2008;285: 146-158.
- 408 4. Pauly D, Christensen V, Dalsgaard J, Froese R, Torres F Jr. Fishing down marine food webs.  
409 *Science* 1998;279:860-863.
- 410 5. Naylor RL, Goldburg RJ, Primavera JH, Kautsky N, Beveridge MC, Clay J, et al. Effect of  
411 aquaculture on world fish supplies. *Nature* 2000;405:1017-1024.
- 412 6. Gatlin DM, Barrows FT, Brown P, Dabrowski K, Gaylord TG, Hardy RW et al. Expanding  
413 the utilization of sustainable plant products in aquafeeds: a review. *Aquac Res.* 200;738:551-  
414 579.
- 415 7. Barrows FT, Gaylord TG, Sealey, W.M., Smith, C.E., Porter, L. Supplementation of plant-  
416 based diets for rainbow trout (*Oncorhynchus mykiss*) with macro-minerals and inositol.  
417 *Aquac Nutr.* 2010;16:654-661.
- 418 8. Gaylord TG, Barrows FT, Teague AM, Johansen KA., Overturf KE, Shepherd B.  
419 Supplementation of taurine and methionine to all-plant protein diets for rainbow trout  
420 (*Oncorhynchus mykiss*). *Aquaculture* 2007;269:514-524.
- 421 9. Zhou QC, Wu Z, Chi S, Yang Q. Dietary lysine requirement of juvenile cobia (*Rachycentron*  
422 *canadum*). *Aquaculture* 2007;273:634-640.

- 423 10. Turchini GM, Trushenski JT, Glencross BD. Thoughts for the future of aquaculture nutrition:  
424 realigning perspectives to reflect contemporary issues related to judicious use of marine  
425 resources in aquafeeds. *N Am J Aquacult.* 2018;DOI:10.1002/naaq.10067.
- 426 11. Fernandez-Jover D, Arechavala-Lopez P, Martinez-Rubio L, Tocher DR, Bayle-Sempere JT,  
427 Lopez-Jimenez JA, et al. Monitoring the influence of marine aquaculture on wild fish  
428 communities: benefits and limitations of fatty acid profiles. *Aquacult Environ Interact.*  
429 2001;2:39-47.
- 430 12. Lorenzen K, Agnalt A-LA, Blankenship HL, Hines AH, Leber KM, Loneragan NR, Taylor  
431 MD. Evolving context and maturing science: aquaculture-based enhancement and restoration  
432 enter the marine fisheries management toolbox. *Rev Fish Sci.* 2013;21:213-221.
- 433 13. Agnisola C, McKenzie DJ, Taylor EW, Bolis CL, Tota B. Cardiac performance in relation to  
434 oxygen supply varies with dietary lipid composition in sturgeon. *Am J Physiol.*  
435 1996;271:R417-425.
- 436 14. McKenzie DJ. Effects of dietary fatty acids on the respiratory and cardiovascular physiology  
437 of fish. *Comp. Biochem Physiol A Mol Integr Physiol.* 2001;128:607-621.
- 438 15. McKenzie DJ, Piraccini G, Steffensen JF, Bolis CL, Bronzi P, Taylor EW. Effects of diet on  
439 spontaneous locomotor activity and oxygen consumption in Adriatic sturgeon (*Acipenser*  
440 *naccarii*). *Fish Physiol Biochem.* 1995;14:341-55.
- 441 16. Randall DJ, Mckenzie DJ, Abrami G, Bondiolotti GP, Natiello F, Bronzi P, Bolis L, Agradi  
442 E. Effects of Diet on Response to Hypoxia in Sturgeon (*Acipenser naccarii*). *J Exp Biol.*  
443 1992;125:113-125.

- 444 17. Wagner GN, Balfry SK, Higgs DA, Lall SP, Farrell AP. Dietary fatty acid composition  
445 affects the repeat swimming performance of Atlantic salmon in seawater. *Comp Biochem*  
446 *Physiol A Mol Integr Physiol.* 2004;137;567-76.
- 447 18. Ripps H, Shen WK. Review: Taurine: A “very essential” amino acid. *Mol Vis* 2012;18:  
448 2673-2686.
- 449 19. Schaffer SW, Jong CJ, Ramila KC, Azuma J. Physiological roles of taurine in heart and  
450 muscle. *J Biomed Sci.* 2010;S2;1-2.
- 451 20. Schuller-Levis GB, Park E. Taurine: new implications for an old amino acid. *FEMS*  
452 *Microbiol Lett.* 2003;226;195-202.
- 453 21. L’Amoreaux W. The roles of taurine in the retina. In: *Taurine in Health and Disease*, El  
454 Idrissi A, L’Amoreaux W, editors. Kerala, India: Transworld Research Network; 2015. p.  
455 215-254. ISBN: 978-81-7895-520-9.
- 456 22. Hillenkamp J, Hussain AA, Jackson TL, Constable PA, Cunningham JR, Marshall J.  
457 Compartmental analysis of taurine transport to the outer retina in the bovine eye. *Invest*  
458 *Ophth Vis Sci.* 2004;45;4099-4105.
- 459 23. Lake N. Electroretinographic deficits in rate treated with Guanidinoethyl sulfonate, a  
460 depletory of taurine. *Exp Eye Res.* 1986;42;87-91.
- 461 24. Lake N, Malik N. Retinal morphology in rates treated with a taurine transport antagonist.  
462 *Exp Eye Res.* 1987;44;331-346.
- 463 25. Gisselmann G, Galler A, Friedrich F, Hatt H, Bormann J. Cloning and functional  
464 characterization of two glycine receptor alpha-subunits from the perch retina. *Eur J Neurosci.*  
465 2002;16;69-80.

- 466 26. Marc RE, Cameron D. A molecular phenotype atlas of the zebrafish retina. *J Neurocytol.*  
467 2001;30:593-654.
- 468 27. Negishi K, Drujan BD. Effects of some amino acids on horizontal cells in the fish retina. *J*  
469 *Neurosci Res.* 1979;4:351-263.
- 470 28. Nusetti S, Obregón F, Quintal M, Benzo Z, Lima L. Taurine and zinc modulate outgrowth  
471 from goldfish retinal explants. *Neurochem Res.* 2005;30:1483-1492.
- 472 29. Omura Y, Yoshimura R. Immunocytochemical localization of taurine in the developing  
473 retina of the lefteye flounder *Paralichthys olivaceus*. *Arch Histol Cytol.* 1999;62:441-446.
- 474 30. Omura Y, Hach A, Furukawa E, Ueck M, Lake N. Immunocytochemical localization of  
475 taurine in the pineal organ and retina of an anadromous fish, *Plecoglossus altivelis*. *Arch*  
476 *Histol Cytol.* 1997;60:153-162.
- 477 31. Lombardini JB. Taurine: retinal function. *Brain Res Rev.* 1991;16:151-169.
- 478 32. Fritches KA, Brill RW, Warrant EJ. Warm eyes provide superior vision in swordfishes. *Curr*  
479 *Biol.* 2005;15;55-58.
- 480 33. Brill R, Magel C, Davis M, Hannah R, Rankin P. Effects of rapid decompression and  
481 exposure to bright light (simulated capture) on the visual function of black rockfish (*Sebastes*  
482 *melanops*) and Pacific halibut (*Hippoglossus stenolepis*). *Fish Bulletin.* 2008;106:427-437.
- 483 34. Horodysky AZ, Brill RW, Warrant EJ, Musick JA, Latour RJ. Comparative visual function in  
484 five sciaenid fishes inhabiting Chesapeake Bay. *J Exp Biol* 2008;211;3601-3612.
- 485 35. Horodysky AZ, Brill RW, Warrant EJ, Musick JA, Latour RJ. Comparative visual function in  
486 four piscivorous fishes inhabiting Chesapeake Bay. *J Exp Biol.* 2010;213; 1751-1761.
- 487 36. Kalonoski M, Hiron A, Horodysky A, Brill R. Spectral sensitivity, light sensitivity, and  
488 temporal resolution of the visual systems in three sympatric coastal shark species: sandbar

- 489 shark (*Carcharhinus plumbeus*), smooth dogfish (*Mustelus canis canis*), and spiny dogfish  
490 (*Squalus acanthias*). J Comp Physiol B. 2014:200;997-1013.
- 491 37. Stavenga DG, Smiths RP, Hoenders BJ. Simple exponential functions describing the  
492 absorbance bands of visual pigment spectra. Vis Res. 1993:33;1011-1017.
- 493 38. Govardovskii VI, Fyhrquist N, Reuter T, Kuzmin DG, Donner K. In search of the visual  
494 pigment template. Vis Neurosci. 2000:17;509-528.
- 495 39. Burnham KP, Anderson DR. Model selection and multimodel inference: a practical  
496 information-theoretic approach. New York: Springer; 2002.
- 497 40. Schmidt SY, Berson EL, Watson G, Huang C. Retinal degeneration in cats fed casein III.  
498 Taurine deficiency and ERG amplitudes. Invest Ophthalmol Vis Sci. 1977:16;673-678.
- 499 41. Horodysky, A. Z., R. W. Brill, K. C. Crawford, E. S. Seagroves, and A. K. Johnson..  
500 Comparative visual ecophysiology of mid-Atlantic temperate reef fishes. Biol. Open.  
501 2013:2;1371-1381.
- 502 42. Rust MB, Barrows FT, Hardy RW, Lazur AL, Naughten K, Silverstein J. Alternative feeds  
503 initiative. The future of aquafeeds. National Oceanic and Atmospheric Administration /  
504 United State Department of Agriculture 2011:NOAA Tech. Memo. NMFS-F/SPO-124.
- 505 43. Hardy RW. New developments in aquatic feed ingredients, and potential of enzyme  
506 supplements. In: Cruz-Saurez LE, Ricque-Marie D, Tapia-Salazar M, Olvera-Novoa MA,  
507 Civera-Cerecedo R, editors. Avances En Nutrition Acuicola V. Memorias Del V Simposium  
508 Internacional de Nutricion Acuicola. 2000 Merida, Yucutan, Mexico, p. 216-226.
- 509 44. Barrows FT, Gaylord TG, Sealey WM, Porter L, Smith CE. The effect of vitamin premix in  
510 extruded plant-based and fish meal based diets on growth efficiency and health of rainbow  
511 trout, *Oncorhynchus mykiss*. Aquaculture. 2008:283;148-155.

- 512 45. Palti Y, Silverstein JT, Wieman H, Phillips JG, Barrows FT, Parsons JE. Evaluation of  
513 family growth response to fishmeal and gluten-based diets in rainbow trout (*Oncorhynchus*  
514 *mykiss*). *Aquaculture*. 2006;255:548-556.
- 515 46. Watson AM, Kissil GW, Barrows FT, Place AR. Developing a plant-based diet for cobia  
516 *Rachycentron canadum*. *Int. Aquafeed*. 2012;15:34-38.
- 517 47. Espe M, Holen E. Taurine attenuates apoptosis in primary liver cells isolated from Atlantic  
518 salmon (*Salmo salar*). *British J Nutritio*. 2013;110:20-28.
- 519 48. Hayes KC, Rabin AR, Berson EL. An ultrastructural study of nutritionally induced and  
520 reversed retinal degeneration in cats. *Am J Pathol*. 1975a;78:504-524.
- 521 49. Hayes KC, Carey RC, Schmidt SY. Retinal degeneration associated with taurine deficiency  
522 in the cat. *Science* 1975b;188:949-951.
- 523 50. Warrant EJ. Seeing better at night: life style, eye design and the optimum strategy of spatial  
524 and temporal summation. *Vis Res*. 1999;39:1611-1630.
- 525 51. Warrant E. Vision in the dimmest habitats on earth. *J Comp Physiol A*. 2004;190:765-789.
- 526 52. Fritsches KA, Marshall NJ, Warrant EJ. Retinal specializations in the blue marlin: Eyes  
527 designed for sensitivity to low light levels. *Mar Freshwater Res*. 2003;54:333-341.
- 528 53. Lisney TJ, Collin SP. Retinal ganglion cell distribution and spatial resolving power in  
529 elasmobranchs. *Brain Behav Evol*. 2008;72:59-77.
- 530 54. Litherland L, Collin SP. Comparative visual function in elasmobranchs: spatial arrangement  
531 and ecological correlates of photoreceptor and ganglion cell distributions. *Vis Neurosci*.  
532 2008;25:549-561.
- 533 55. Frank TM. Comparative study of temporal resolution in the visual systems of mesopelagic  
534 crustaceans. *Biol Bull*. 1999;196:137-144.



- 535 56. Frank TM. Temporal resolution in mesopelagic crustaceans. *Philos Trans R Soc.*  
536 2000:355;1195-1198.
- 537 57. Frank TM. Effects of light adaptation on the temporal resolution of deep-sea crustaceans.  
538 *Integr Comp Biol.* 2003:43;559-570.
- 539 58. Wald G. The significance of vertebrate metamorphosis. *Science* 1958:128;1481-1490.
- 540 59. Dartnall HJA, Lythgoe JN. The spectral clustering of visual pigments. *Vision Res.*  
541 1965:5;81-100.
- 542 60. McFarland WN, Allen DM. The effect of extrinsic factors on two distinctive rhodopsin-  
543 porphyropsin systems. *Can J Zool.* 1977:55;1000-1009.
- 544 61. Cheng CL, Flamarique IN. Opsin expression: new mechanism for modulating colour vision.  
545 *Nature* 2004:428;279.
- 546 62. Bowmaker JK. Evolution of vertebrate visual pigments. *Vis Res.* 2008:48;2022-2041.
- 547 63. Schweikert LE, Grace MS. Altered environmental light drives retinal change in the Atlantic  
548 Tarpon (*Megalops atlanticus*) over timescales relevant to marine environmental disturbance.  
549 *BMC Ecol.* 2018:18;1, <https://doi.org/10.1186/s12898-018-0157-0>.
- 550 64. Schweikert LE, Grace MS. Spectral sensitivity change may precede habitat shift in the  
551 developing retina of the Atlantic tarpon (*Megalops atlanticus*) *Physiol Biochem Zool.*  
552 2017:90;553-563.
- 553 65. Johnson AM, Stanis S, Fuller RC. Diurnal lighting patterns and habitat alter opsin expression  
554 and colour preferences in a killifish. *Proc R Soc B* 2013:280;20130796.  
555 <http://dx.doi.org/10.1098/rspb.2013.0796>.

- 556 66. Shand J, Davies WL, Thomas N, Balmer L, Cowing JA, Pointer M. The influence of  
557 ontogeny and light environment on the expression of visual pigment opsins in the retina of  
558 the black bream, *Acanthopagrus butcheri*. J Exp Biol. 2008;211;1495-1503.
- 559 67. Taylor SM, Loew ER, Grace MR.. Ontogenic retinal changes in three ecologically distinct  
560 elopmorph fishes (Elopomorpha: Teleostei) correlate with light environment and behavior.  
561 Vis Neurosci. 2015;32;1-15.
- 562 68. Munz FW. Vision: visual pigments. In: Hoar WS, Randall DJ, editors. Fish Physiology vol 5.  
563 New York: Academic Press; 1971: p 1-32.
- 564 69. Munz FW, McFarland WN. The significance of spectral position in the rhodopsins of tropical  
565 marine fishes. Vision Res. 1973;13;1829-1874.
- 566 70. Crescitelli F, McFall-Ngai M, Horwitz, J. The visual pigment sensitivity hypothesis: further  
567 evidence from fishes of varying habitats J Comp Physiol A, 1985;157;323-333.
- 568 71. Lythgoe JN Vision in fishes: ecological adaptations. In: Ali MA, editor. Environmental  
569 physiology of fishes, NATO Advanced Study Institutes Series (Series A: Life Sciences) vol  
570 35. Boston: Springer; 1980: p 431-445.
- 571 72. Lythgoe JN (1988) Light and vision in the aquatic environment. In: Atema J, Fay RR, Popper  
572 AN, Tavolga WN, editors. Sensory biology of aquatic animals. New York: Springer; p 57-82.
- 573 73. McFarland W Light in the sea: the optical world of elasmobranchs. J Exp Zool. 1990;256;3-  
574 12.
- 575
- 576
- 577
- 578

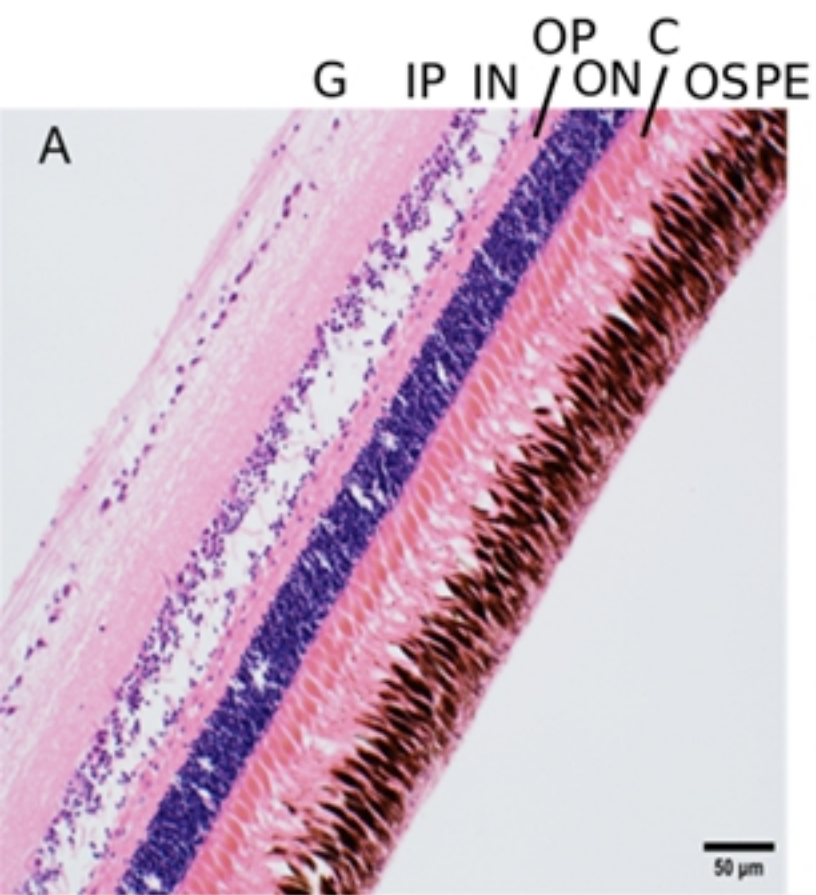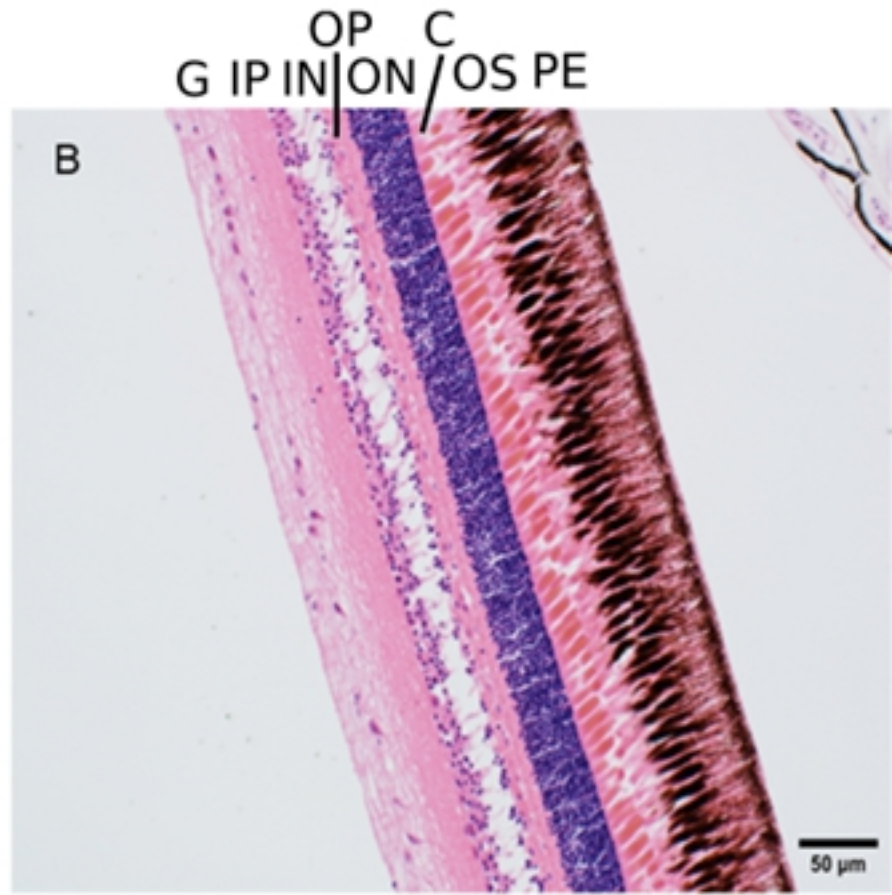

Figure

Layer thickness ratio

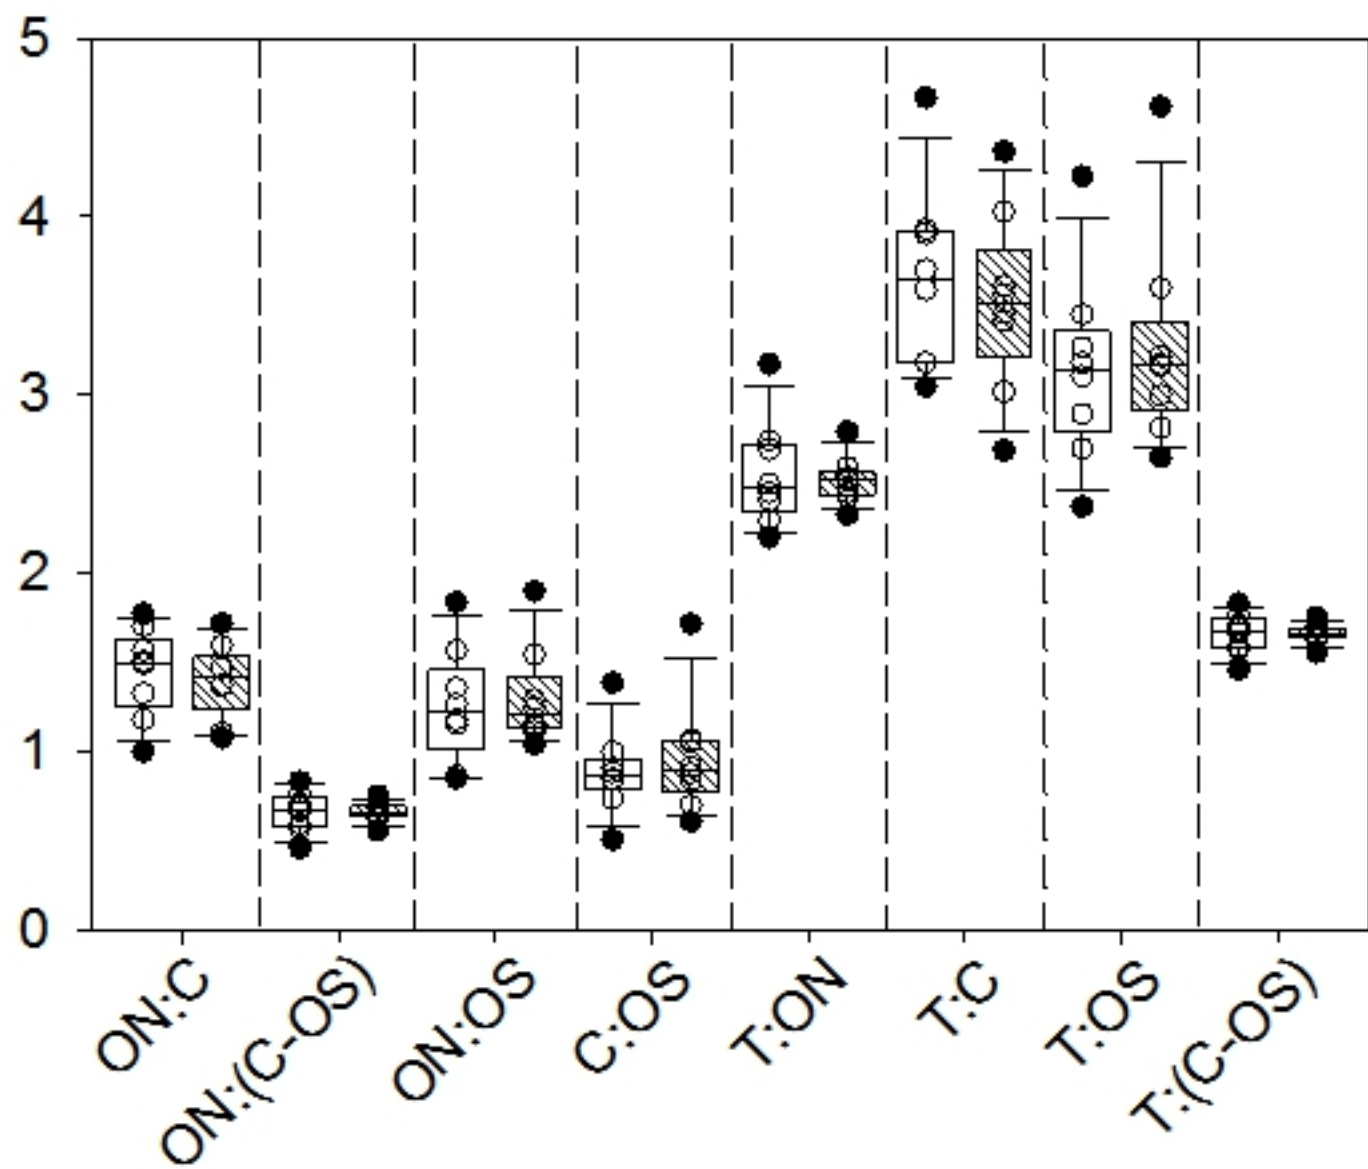

Figure

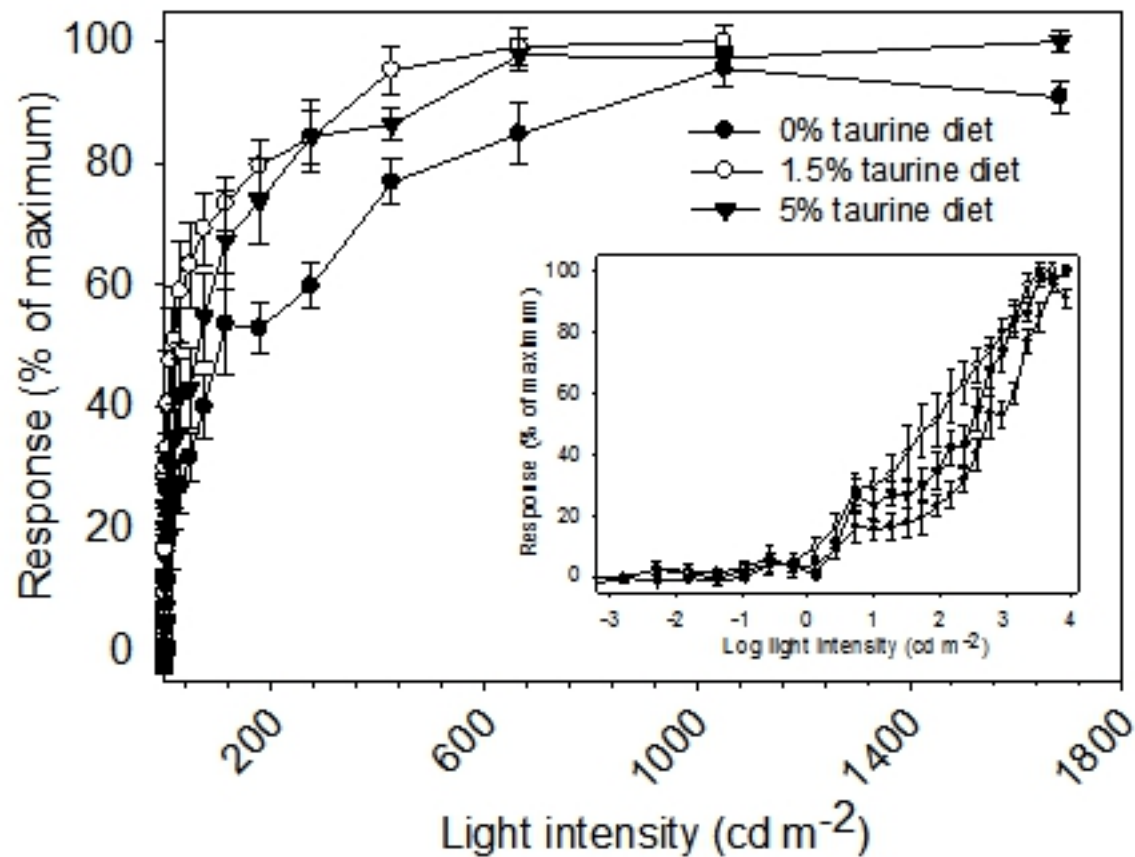

Figure

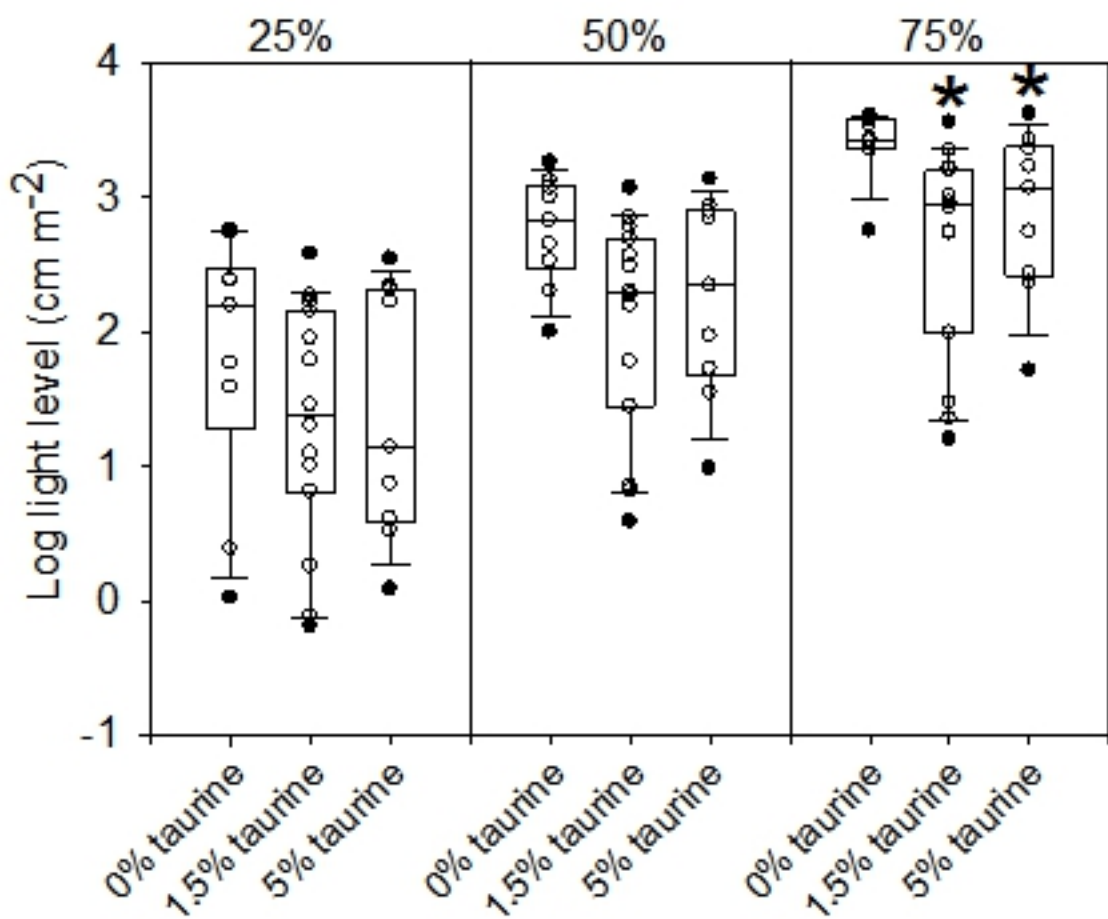

Figure

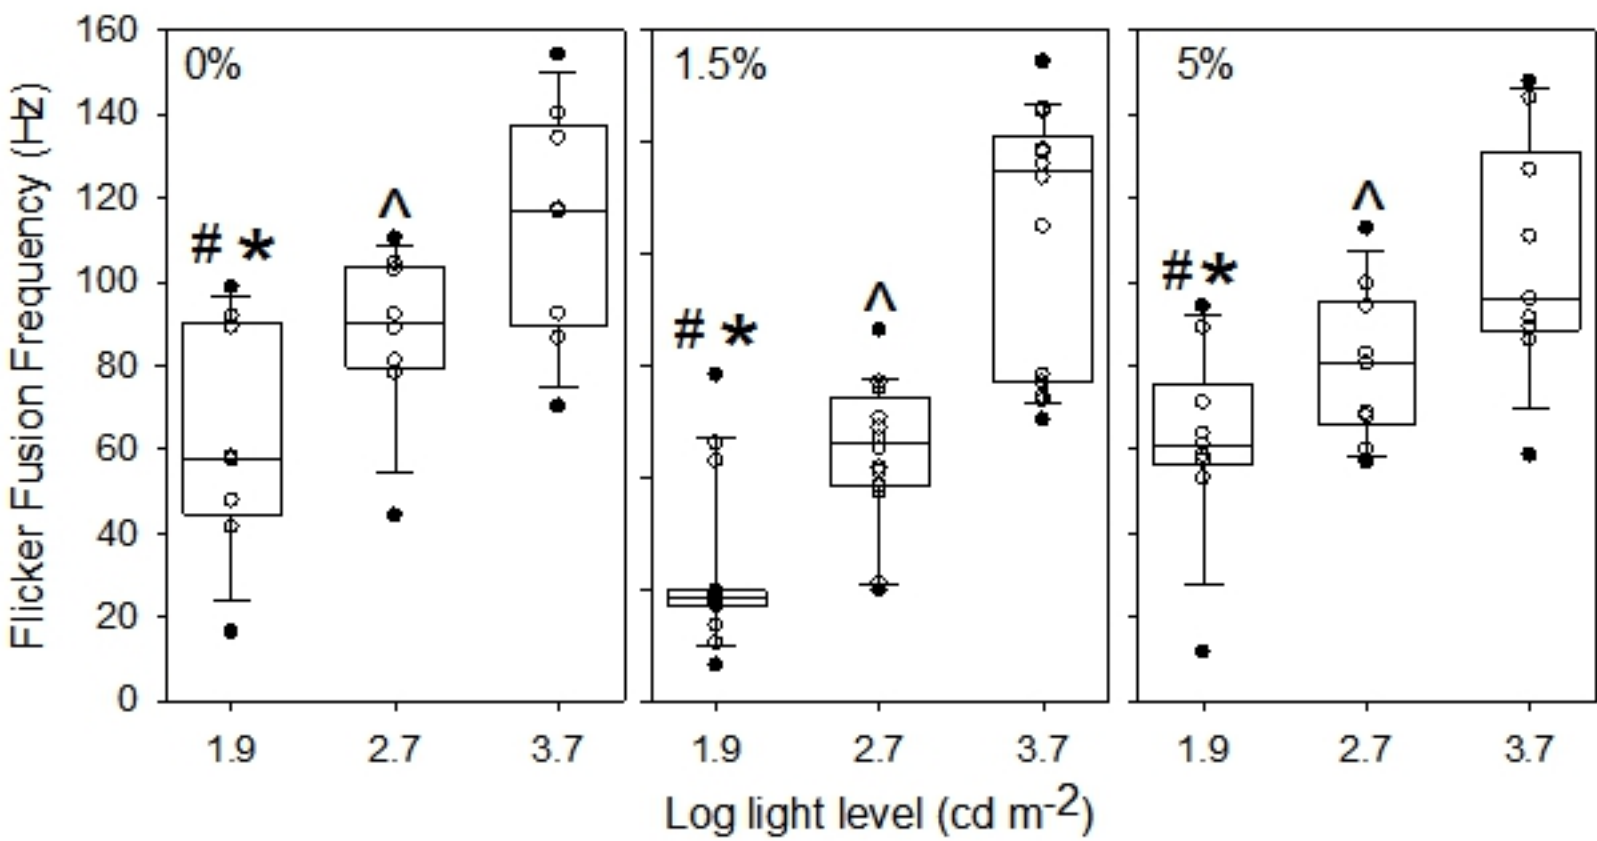

Figure

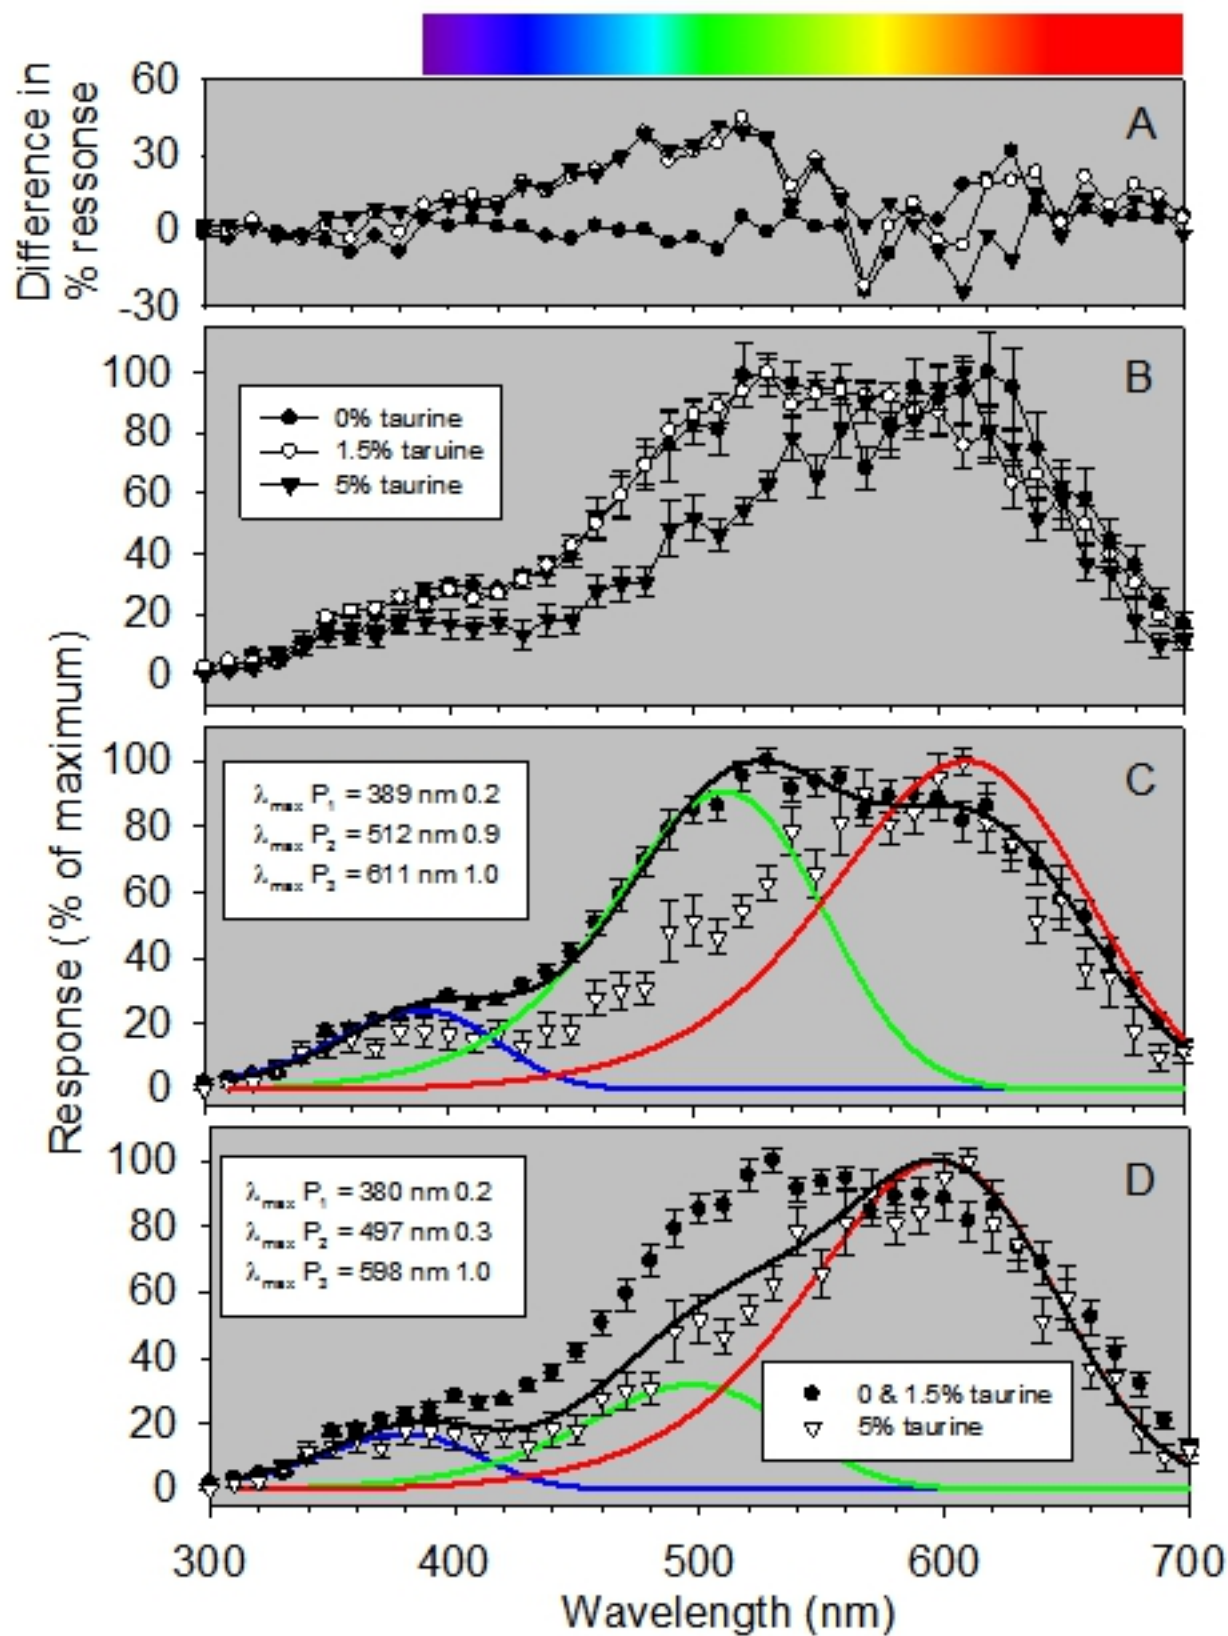

Figure
